# Supplementary material for: Growth Differentiation Factor-15 Correlates Inversely with Protease-Activated Receptor-1-Mediated Platelet Reactivity in Patients with Left Ventricular Assist Devices
Source: MDPI journal article supplement (doi:10.3390/ph15040484), 2022-04-15
Supplement: s1 [file s1]

**Supplementary Table S1:** Baseline characteristics comparing patients included in the final analysis and patients without available plasma sample.

|                                          | Sample available | No Sample        | p-value |
|------------------------------------------|------------------|------------------|---------|
|                                          | <i>N=51</i>      | <i>N=16</i>      |         |
| Age, years                               | 62 [55-69]       | 62 [55-72]       | 0.612   |
| Sex, No.(%):                             |                  |                  |         |
| Female patients                          | 5 (9.8)          | 1 (6.3)          | 0.664   |
| Ventricular assist device, No.(%):       |                  |                  |         |
| HVAD                                     | 15 (29.4)        | 5 (31.3)         |         |
| HM2                                      | 2 (3.9)          | 1 (6.3)          | 0.908   |
| HM3                                      | 34 (66.7)        | 10 (62.5)        |         |
| Body mass index, kg/m2                   | 29.4 [25.9-31.8] | 28.2 [26.3-29.3] | 0.543   |
| Type of cardiomyopathy, No.(%):          |                  |                  |         |
| ischemic CMP                             | 38 (74.5)        | 11 (68.8)        |         |
| dilatative CMP                           | 13 (25.5)        | 5 (31.2)         | 0.650   |
| Flow, min-l                              | 4.9 [4.3-5.2]    | 5.0 [3.8-5.1]    | 0.949   |
| Speed RPM                                | 5350 [2925-5700] | 5550 [2800-5775] | 0.595   |
| History of arterial hypertension, No.(%) | 29 (56.9)        | 8 (50)           | 0.630   |
| Hyperlipidemia, No.(%)                   | 23 (45.1)        | 10 (62.5)        | 0.224   |
| Diabetes                                 | 10 (19.6)        | 7 (43.8)         | 0.053   |
| Atrial fibrillation, No.(%)              | 20 (39.2%)       | 5 (31.3)         | 0.565   |
| Cerebrovascular disease, No.(%)          | 2 (3.9%)         | 0 (0.0)          | 0.701   |
| Hemoglobin, g/dl                         | 13.3 [11.7-14.4] | 12.3 [11.5-13.7] | 0.233   |
| Thrombocytes, G/l                        | 222 [178-265]    | 205 [170-299]    | 0.977   |
| White blood cell count, G/l              | 8.28 [6.25-9.73] | 8.7 [6.3-12.8]   | 0.410   |
| Creatinine, mg/dl                        | 1.18 [1.02-1.64] | 1.6 [1.1-2.1]    | 0.061   |
| INR                                      | 2.40 [2.10-2.70] | 2.4 [1.9-2.6]    | 0.412   |

|                                           | Sample available | No Sample        | p-value |
|-------------------------------------------|------------------|------------------|---------|
|                                           | <i>N=51</i>      | <i>N=16</i>      |         |
| proBNP                                    | 1022 [567-1691]  | 2708 [1084-3951] | 0.015   |
| high sensitivity C-reactive protein, mg/l | 0.27 [0.13-0.59] | 0.47 [0.34-1.44] | 0.056   |
| Vitamin K antagonist, No.(%)              | 51 (100%)        | 16 (100%)        | .       |
| Aspirin, No.(%)                           | 51 (100%)        | 16 (100%)        | .       |
| ACE-I or ARB, No.(%)                      | 36 (70.6%)       | 6 (37.5)         | 0.054   |
| Furosemide, No.(%)                        | 45 (88.2%)       | 13 (81.3)        | 0.475   |
| Statin, No.(%)                            | 34 (68.0%)       | 12 (80)          | 0.424   |
